# Supplementary material
Source: PubMed Central journal article supplement (PMC2719356)
Supplement: M109.007641_1.pdf [file M109.007641_1.pdf]

## SUPPLEMENTARY MATERIALS

**Figure S-1. Primer extension assay of DNAP in presence of  $Ca^{2+}$  and  $Mg^{2+}$  divalent metal cofactors.**

**A** and **B** show the extended products of 0mm-T construct (sequence shown at the top) with Klenow and Klentaq respectively. **A.** Primer extension in the presence of all dNTPs in  $Mg^{2+}$  (lane 1); primer extension in the presence of all dNTPs in  $Ca^{2+}$  (lane 2); free construct (lane 3). **B.** The left and the right panels represent products obtained in the presence of  $Mg^{2+}$  and  $Ca^{2+}$  respectively. Primer extension in the presence of all dNTPs (lane 1); primer extension in presence of dATP (lane 2); free construct (lane 3).

**Figure S-2. CD spectra for Klenow-DNA complexes in  $Ca^{2+}$  and  $Mg^{2+}$  buffers.** **A-D** represent the CD spectra for Klenow-ssP16-1 (**A-B**) and Klenow-P16-2 (**C-D**) complexes in the presence of  $Ca^{2+}$  (**A** and **C**) and  $Mg^{2+}$  (**B** and **D**) buffers. Color coding is the same for all the panels: dark green, ssP16-1; red, P16-2 construct; pink, P16-2 construct plus Klenow.

**Figure S-3. Klenow and Klentaq DNA polymerases bound to matched P/T DNA at low  $[Mg^{2+}]$  conditions.** **A-C** show the low energy CD of the complexes formed with 0mm-A construct and Klenow (**A-B**) and Klentaq (**C**) in different buffer conditions (see Experimental Procedures for buffer compositions). Color coding same for all the panels; dark green, ssP16-1; red, 0mm-A construct; pink, 0mm-A construct + DNAP in no  $Mg^{2+}$  buffer; purple, 0mm-A construct + DNAP in  $Mg^{2+}$  + EDTA buffer; blue, 0mm-A construct + DNAP in EDTA buffer; light green, 0mm-A construct + Klenow + dTTP in  $Mg^{2+}$  + EDTA buffer.

**Figure S-4. Klenow binding to the P/T constructs exhibit a 1:1 stoichiometry.** Panels **A-D** show calculated  $c(s)$  plots for Klenow polymerase in the presence and absence of various DNA constructs in different buffers. (**A**) Klenow alone in EDTA buffer. (**B**) Klenow plus the 3mm construct in  $Ca^{2+}$  buffer. (**C**) Klenow plus the 0mm-A construct in EDTA buffer. (**D**) Klenow plus 0mm-A construct in  $Ca^{2+}$  buffer. (**E**) The  $s_{20,w}$  values and the estimated and calculated molecular weights for each of the above complexes. The molecular weights estimated from the  $s_{20,w}$  values confirm that stoichiometric 1:1 complexes of Klenow were formed with the DNA constructs under all the buffer conditions used. The partial specific volume used for Klenow alone was 0.73 ml/g and that for the Klenow-DNA complexes was 0.695 ml/g. Sedfit analysis of Klenow alone and Klenow-DNA complexes yielded frictional ratios of  $\sim 1.1$  and  $\sim 1.3$  respectively, suggesting that both are roughly globular in shape. The rmsd values for all the fits were  $\sim 0.009$ .

Figure S-1.

Omm-T const  
5' GCAAGAACCGAACCAA  
|||||  
3' CGTTCTTGGCTTGGTTTAACTAATC

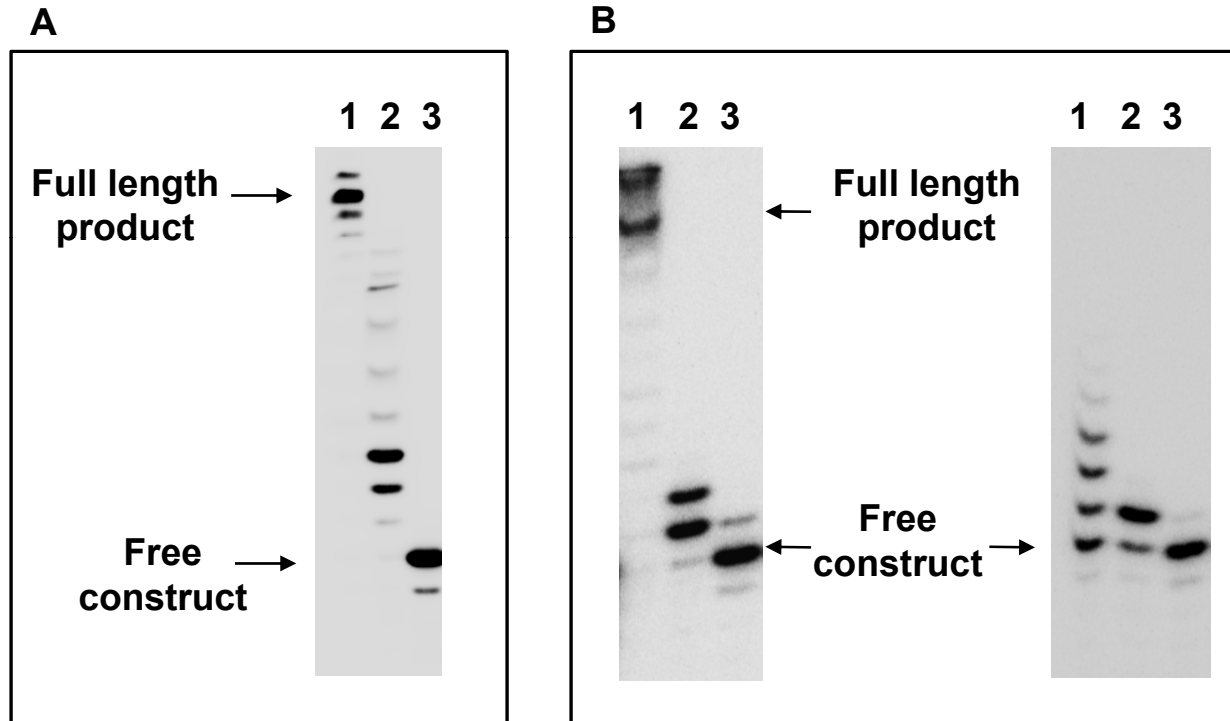

Figure S-2.

ssP16-1  
 5' GCAAGAACCGAACCAA

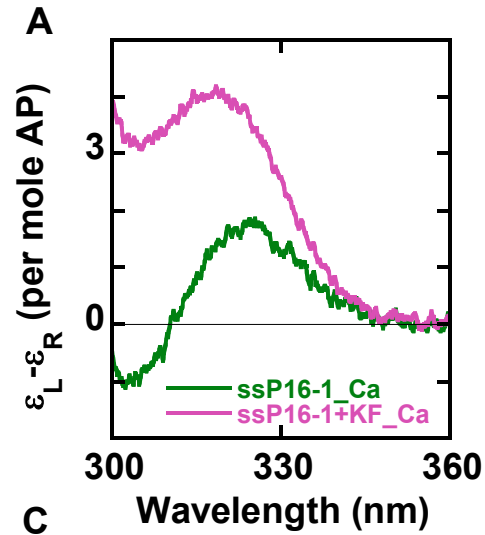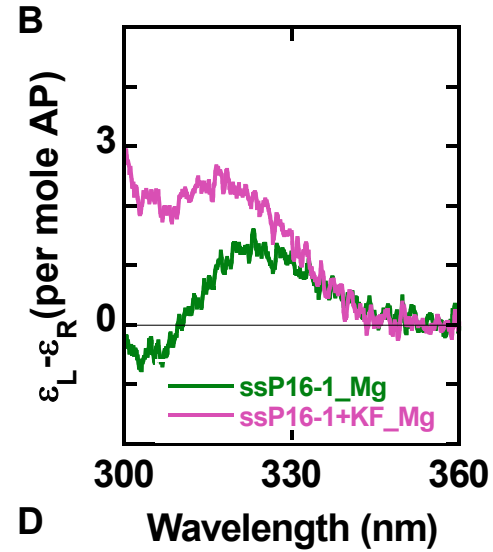

P16-2 construct  
 5' GCAAGAACCGAACCAA  
 |||||  
 3' CGTTCTTGGCTTGGTTAAACTAATC

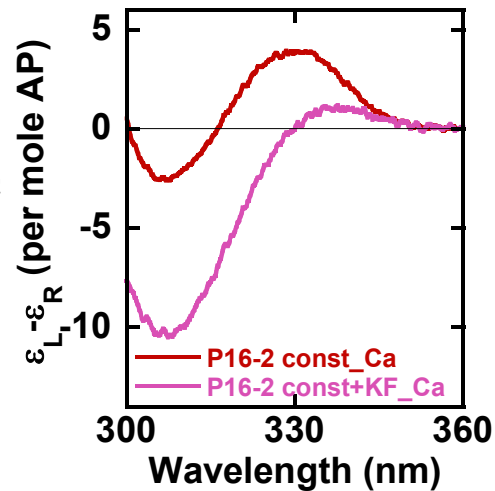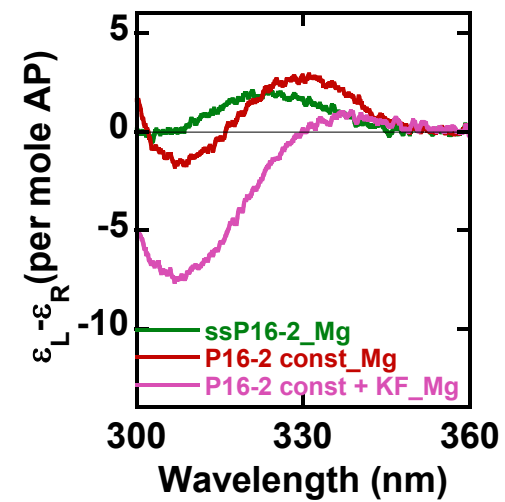

Figure S-3.

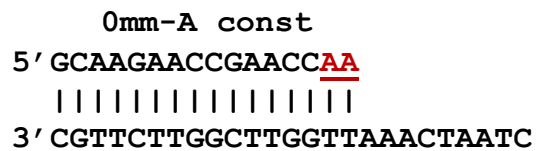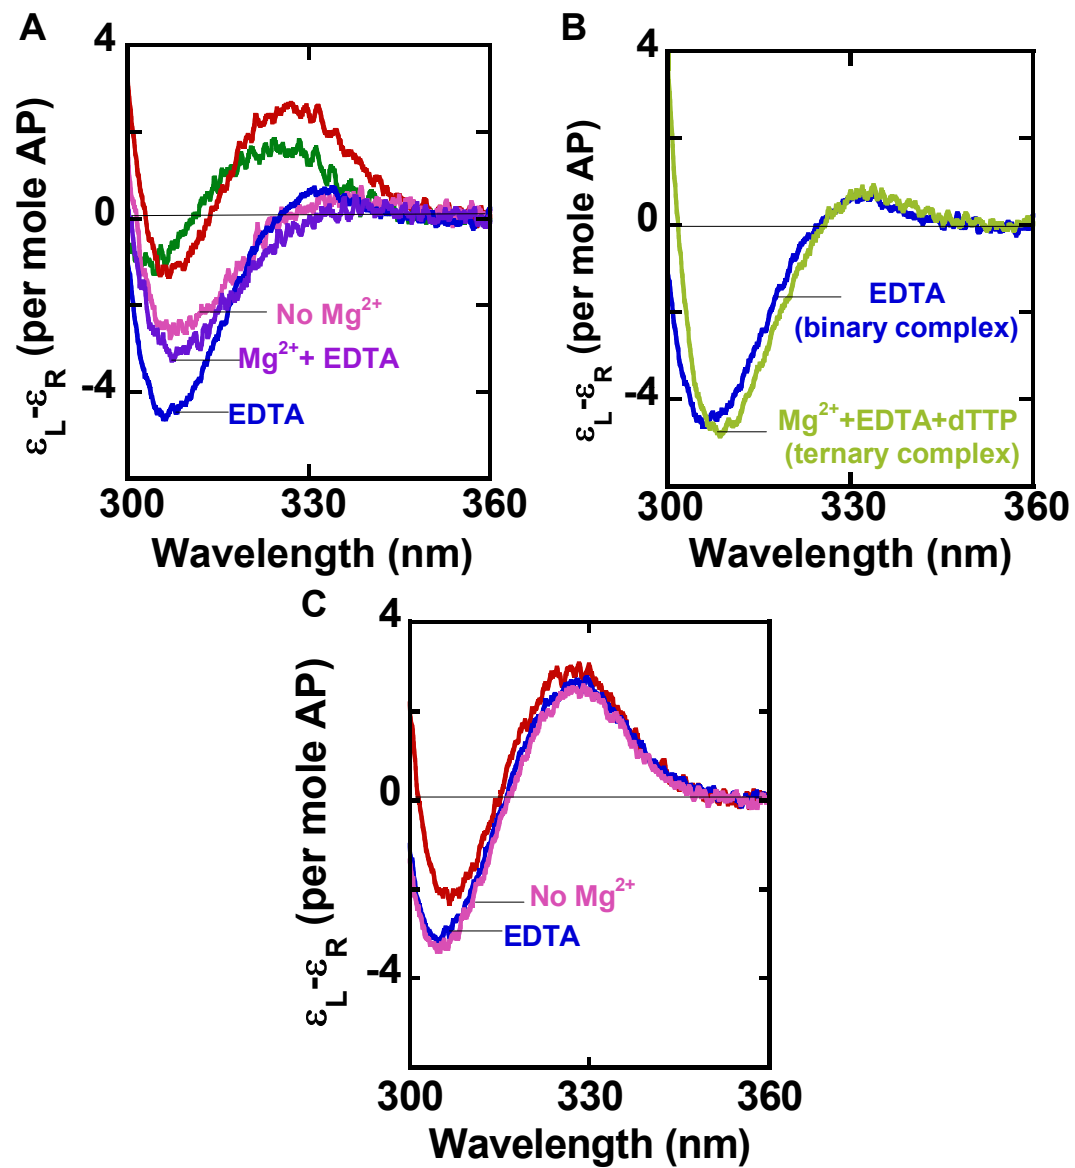

Figure S-4.

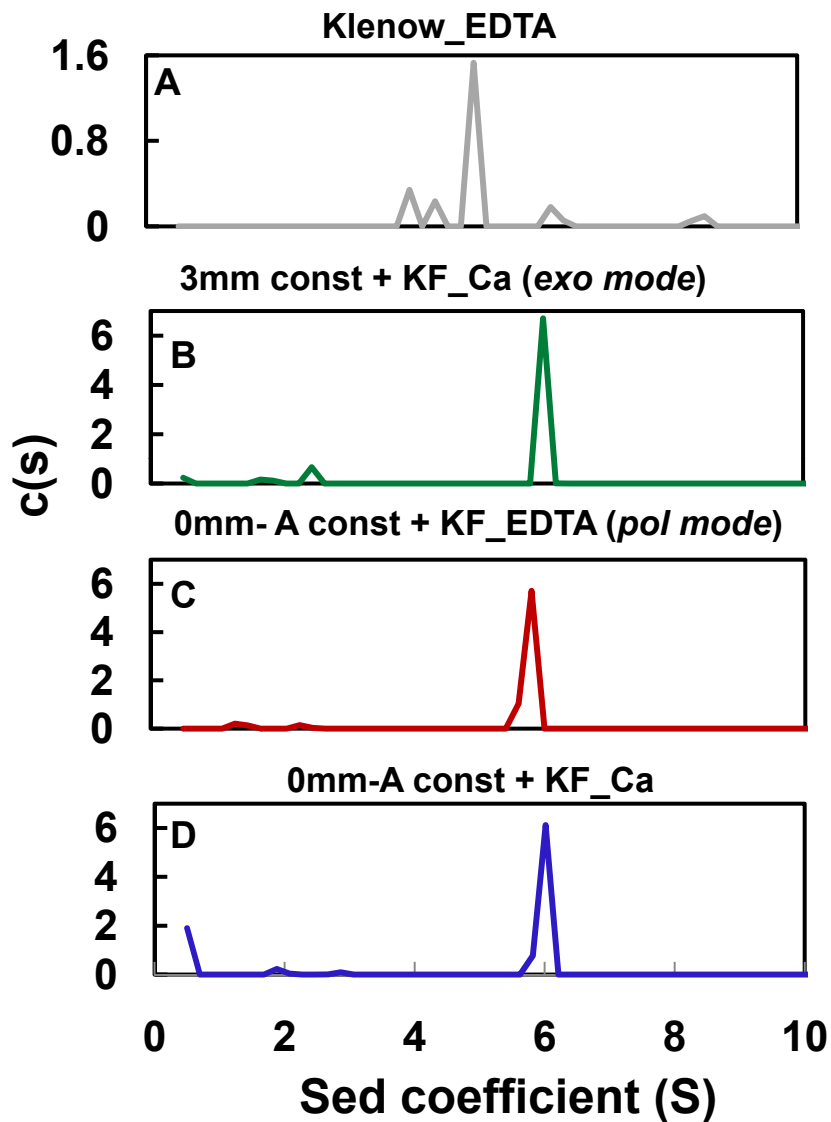

**E**

| Sample                             | $S_{20w}$<br>(S)       | Estimated<br>MW (Da) | Calculated<br>MW (Da) |
|------------------------------------|------------------------|----------------------|-----------------------|
| Klenow_EDTA                        | 5.05<br>( $\pm 0.08$ ) | 68294                | 68000                 |
| 3mm<br>const+KF(Ca <sup>2+</sup> ) | 6.04<br>( $\pm 0.08$ ) | 80556                | 80469                 |
| 0mm<br>const+KF(EDTA)              | 5.82<br>( $\pm 0.11$ ) | 80901                | 80516                 |
| 0mm<br>const+KF(Ca <sup>2+</sup> ) | 6.02<br>( $\pm 0.10$ ) | 80200                | 80516                 |
